# Supplementary material for: The recent and future health burden of the U.S. mobile sector apportioned by source
Source: PubMed Central journal article supplement (PMC8048113; doi:10.1088/1748-9326/ab83a8), 2020-07-06
Supplement: NIHMS1682500-supplement-Published_Supplementary_Information.pdf [file NIHMS1682500-supplement-Published_Supplementary_Information.pdf]

## Supplemental Information

---

**Title:** The Recent and Future Health Burden of the U.S. Mobile Sector Apportioned by Source

**Authors:** Kenneth Davidson (corresponding author)<sup>a</sup>, Neal Fann<sup>b</sup>, Margaret Zawacki<sup>c</sup>, Charles Fulcher<sup>b</sup>, Kirk R. Baker<sup>b</sup>

<sup>a</sup> US EPA, Office of Transportation and Air Quality, Air 4-1, San Francisco, CA 94105  
([davidson.ken@epa.gov](mailto:davidson.ken@epa.gov); 1-415-972-3633)

<sup>b</sup> US EPA, Office of Air Quality Planning and Standards, Research Triangle Park, NC 27711  
([fann.neal@epa.gov](mailto:fann.neal@epa.gov), [baker.kirk@epa.gov](mailto:baker.kirk@epa.gov), [fulcher.charles@epa.gov](mailto:fulcher.charles@epa.gov))

<sup>c</sup> US EPA, Office of Transportation and Air Quality, Ann Arbor, MI 48105 ([zawacki.margaret@epa.gov](mailto:zawacki.margaret@epa.gov))

**Disclaimer:** The views expressed in this article are those of the authors and do not necessarily represent the views or policies of the U.S. Environmental Protection Agency.

**Table S-1: Epidemiological Study Parameters Used to Quantify PM<sub>2.5</sub>-Attributable Risks**

| <b>Endpoint</b>                                       | <b>Study</b>                                                                                                                           | <b>Study Population</b> | <b>Risk Estimate (95 Percent Confidence Interval)<sup>A</sup></b> |
|-------------------------------------------------------|----------------------------------------------------------------------------------------------------------------------------------------|-------------------------|-------------------------------------------------------------------|
| <b>Premature Mortality</b>                            |                                                                                                                                        |                         |                                                                   |
| Cohort study, all-cause                               | Krewski et al. (2009) <sup>1</sup>                                                                                                     | >29 years               | RR = 1.06 (1.04 – 1.06) per 10 µg/m <sup>3</sup>                  |
|                                                       | Lepeule et al. (2012) <sup>2</sup>                                                                                                     | >24 years               | RR = 1.14 (1.07 – 1.22) per 10 µg/m <sup>3</sup>                  |
| <b>Chronic Illness</b>                                |                                                                                                                                        |                         |                                                                   |
| Nonfatal heart attacks                                | Peters et al. (2001) <sup>3</sup>                                                                                                      | >18 years               | OR = 1.62 (1.13 – 2.34) per 20 µg/m <sup>3</sup>                  |
| <b>Hospital &amp; Emergency Department Admissions</b> |                                                                                                                                        |                         |                                                                   |
| Respiratory                                           | Babin et al. (2007) <sup>4</sup> —ICD 493 (asthma)                                                                                     | <18                     | β=0.002 (0.004337)                                                |
|                                                       | Moolgavkar (2000)—ICD 490–496 (COPD) <sup>6</sup>                                                                                      | 18–64 years             | 1.02 (1.01—1.03) per 36 µg/m <sup>3</sup>                         |
|                                                       | Zanobetti and Schwartz (2006) <sup>7</sup> —ICD 470-519 (All Respiratory)                                                              | >64 years               | β=0.00207 (0.00446)                                               |
|                                                       | <i>Pooled using equal weights:</i><br>Zanobetti and Schwartz (2009) <sup>8</sup> —ICD 390-459 (all cardiovascular)                     | >64 years               | β=0.00189 (0.000283)                                              |
| Cardiovascular                                        | Peng et al. (2009) <sup>9</sup> —ICD 426-427; 428; 430-438; 410-414; 429; 440-449 (Cardio-, cerebro- and peripheral vascular disease)  | >64 years               | β=0.00068 (0.000214)                                              |
|                                                       | Peng et al. (2008) <sup>10</sup> —ICD 426-427; 428; 430-438; 410-414; 429; 440-449 (Cardio-, cerebro- and peripheral vascular disease) | >64 years               | β=0.00071 (0.00013)                                               |
|                                                       | Bell et al. (2008) <sup>11</sup> —ICD 426-427; 428; 430-438; 410-414; 429; 440-449 (Cardio-, cerebro- and peripheral vascular disease) | >64 years               |                                                                   |
| Asthma-related ER visits                              | Moolgavkar (2000) <sup>6</sup> —ICD 390–429 (all cardiovascular)                                                                       | 20–64 years             | RR=1.04 (t statistic: 4.1) per 10 µg/m <sup>3</sup>               |
|                                                       | Mar et al. (2004) <sup>12</sup>                                                                                                        |                         | RR = 1.04 (1.01 – 1.07) per 7 µg/m <sup>3</sup>                   |
|                                                       | Slaughter et al. (2003) <sup>13</sup>                                                                                                  | All Ages                | RR = 1.03 (0.98 – 1.09) per 10 µg/m <sup>3</sup>                  |
| <b>Other Health Endpoints</b>                         |                                                                                                                                        |                         |                                                                   |
| Acute bronchitis                                      | Dockery et al. (1996) <sup>14</sup>                                                                                                    | 8–12 years              | OR = 1.50 (0.91 – 2.47) per 14.9 µg/m <sup>3</sup>                |

|                                        |                                                                           |                        |                                                  |
|----------------------------------------|---------------------------------------------------------------------------|------------------------|--------------------------------------------------|
| Upper respiratory symptoms             | Pope et al. (1991) <sup>15</sup>                                          | Asthmatics, 9–11 years | 1.003 (1—1.006) per 10 µg/m <sup>3</sup>         |
| Lower respiratory symptoms             | Schwartz and Neas (2000) <sup>16</sup>                                    | 7–14 years             | OR = 1.11 (1.58 – 1.58) per 15 µg/m <sup>3</sup> |
| Asthma exacerbations                   | Ostro et al. (2001) <sup>17</sup> (cough, wheeze and shortness of breath) | 6–18 years             | RR = 1.04 (1.01 – 1.07) per 7 µg/m <sup>3</sup>  |
|                                        | Mar et al. (2004) (cough, shortness of breath) <sup>12</sup>              |                        | RR = 1.03 (0.98 – 1.09) per 10 µg/m <sup>3</sup> |
| Work loss days                         | Ostro (1987) <sup>18</sup>                                                | 18–65 years            | β=0.0046 (0.00036)                               |
| Minor Restricted Activity Days (MRADs) | Ostro and Rothschild (1989) <sup>20</sup>                                 | 18–65 years            | β=0.00220 (0.000658)                             |

<sup>A</sup> Where available, relative risk (RR) and odds ratios (OR) are reported from each epidemiological study. Otherwise, beta coefficients and standard errors are reported from each study. Beta coefficients were derived from each RR or OR using the following equation: (LN(RR or OR))/unit change in pollution.

**Table S-2: Epidemiological Study Parameters Used to Quantify Ozone-Attributable Risks**

| <b>Endpoint</b>                                       | <b>Study</b>                            | <b>Study Population</b> | <b>Risk Estimate (95<sup>th</sup> Percentile Confidence Interval)<sup>A</sup></b>         |
|-------------------------------------------------------|-----------------------------------------|-------------------------|-------------------------------------------------------------------------------------------|
| <b>Premature Mortality</b>                            |                                         |                         |                                                                                           |
| Time Series                                           | Bell et al. (2004) <sup>21</sup>        | All Ages                | $\beta = 0.000261$ (0.000089)                                                             |
|                                                       | Levy et al. (2005) <sup>22</sup>        | All Ages                | $\beta = 0.001119$ (0.000179)                                                             |
| <b>Hospital &amp; Emergency Department Admissions</b> |                                         |                         |                                                                                           |
| Respiratory                                           | Katsouyanni et al. (2009) <sup>23</sup> | >65                     | $\beta = 0.00064$ (0.00040)                                                               |
|                                                       | Glad et al. (2012) <sup>24</sup>        | All Ages                | $\beta = 0.00306$ (0.00117)                                                               |
|                                                       | Ito et al. (2007) <sup>25</sup>         | >64 years               | $\beta = 0.00521$ (0.00091)                                                               |
|                                                       | Mar and Koenig (2010) <sup>26</sup>     | All ages                | $\beta = 0.01044$ (0.00436) (0-17 yr olds)<br>$\beta = 0.00770$ (0.00284) (18-99 yr olds) |
| Asthma ED visits                                      | Peel et al. (2005) <sup>27</sup>        | All ages                | $\beta = 0.00087$ (0.00053)                                                               |
|                                                       | Sarnat et al. (2013) <sup>28</sup>      | All ages                | $\beta = 0.00111$ (0.00028)                                                               |
|                                                       | Wilson et al. (2005) <sup>29</sup>      | All ages                | RR = 1.022 (0.996 – 1.049)                                                                |
| Asthma Exacerbation                                   | Mortimer et al. (2002) <sup>30</sup>    | 6-18                    | $\beta = 0.00929$ (0.00387)                                                               |
|                                                       | Schildcrout et al. (2006) <sup>31</sup> | 6-18                    | $\beta = 0.00222$ (0.00282)                                                               |
| School loss days                                      | Chen et al. (2000) <sup>32</sup>        | 5-17                    | $\beta = 0.015763$ (0.004985)                                                             |
|                                                       | Gilliland et al. (2001) <sup>33</sup>   | 5-17                    | $\beta = 0.007824$ (0.004445)                                                             |
| Acute Respiratory Symptoms                            | Ostro and Rothschild <sup>20</sup>      | 18-65                   | $\beta = 0.002596$ (0.000776)                                                             |

<sup>A</sup> Where available, relative risk (RR) and odds ratios (OR) are reported from each epidemiological study.

Otherwise, beta coefficients and standard errors are reported from each study. Beta coefficients were derived from each RR or OR using the following equation:  $(\text{LN}(\text{RR or OR}))/\text{unit change in pollution}$ .

**Procedure for projecting death rates to future years**

The BenMAP-CE program contains age- and cause-stratified death rates for each county in the contiguous U.S. through the year 2060 in 5-year increments. To estimate these rates, we calculated annual adjustment factors, based on a series of Census Bureau projected national mortality rates (for all-cause mortality), to adjust the age- and county-specific mortality rates calculated using an average of 2012-2014 data from the CDC-WONDER database as a baseline (Table S-3). We used the following procedure:

1. For each age group, we obtained the series of projected national mortality rates from 2013 to 2050 (see the 2013 rate in Table S-3 below) based on Census Bureau projected life tables.
2. We then calculated, separately for each age group, the ratio of Census Bureau national mortality rate in year Y (Y = 2014, 2015, ..., 2060) to the 2013 rate. These ratios are shown for selected years in Table S-4.
3. Finally, to estimate mortality rates in year Y (Y = 2015, 2020, ..., 2060) that are both age-group-specific and county-specific, we multiplied the county- and age-group-specific mortality rates for 2012-2014 by the appropriate ratio calculated in the previous step. For example, to estimate the projected mortality rate in 2015 among ages 18-24 in Wayne County, MI, we multiplied the mortality rate for ages 18-24 in Wayne County in 2012-2014 by the ratio of Census Bureau projected national mortality rate in 2015 for ages 18-24 to Census Bureau national mortality rate in 2013 for ages 18-24.

**Table S-3: All-Cause Mortality Rate (per 100 people per year) by Source, Year and Age Group**

| <i>Source &amp; Year</i>              | <i>18-24</i> | <i>25-34</i> | <i>35-44</i> | <i>45-54</i> | <i>55-64</i> | <i>65-74</i> | <i>75-84</i> | <i>85+</i> |
|---------------------------------------|--------------|--------------|--------------|--------------|--------------|--------------|--------------|------------|
| <i>Calculated CDC 2012-2014</i>       | 0.078        | 0.107        | 0.173        | 0.405        | 0.862        | 1.797        | 4.628        | 13.580     |
| <i>Census Bureau 2013<sup>A</sup></i> | 0.088        | 0.102        | 0.183        | 0.387        | 0.930        | 2.292        | 5.409        | 13.091     |

<sup>A</sup> For a detailed description of the model, the assumptions, and the data used to create Census Bureau projections, see the working paper, “Methodology and Assumptions for the 2012 National Projections,” which is available on <http://www.census.gov/population/projections/files/methodology/methodstatement12.pdf>

**Table S-4: Ratio of Future Year All-Cause Mortality Rate to 2013 Estimated All-Cause Mortality Rate by Age Group**

| <i>Year</i> | <i>18-24</i> | <i>25-34</i> | <i>35-44</i> | <i>45-54</i> | <i>55-64</i> | <i>65-74</i> | <i>75-84</i> | <i>85+</i> |
|-------------|--------------|--------------|--------------|--------------|--------------|--------------|--------------|------------|
| 2015        | 0.96         | 1.02         | 0.96         | 0.96         | 1.01         | 1.02         | 1.03         | 1.00       |
| 2020        | 0.98         | 1.04         | 0.97         | 0.98         | 1.02         | 1.03         | 1.03         | 1.00       |
| 2025        | 0.74         | 0.80         | 0.75         | 0.77         | 0.85         | 0.91         | 0.93         | 0.97       |

**Table S-5: Baseline and Prevalence Rates for Included Morbidity Endpoints**

| <i>Endpoint</i>                                | <i>Parameter</i>                                                      | <i>Rates</i>                                    |                                                                                                 |
|------------------------------------------------|-----------------------------------------------------------------------|-------------------------------------------------|-------------------------------------------------------------------------------------------------|
|                                                |                                                                       | <i>Value</i>                                    | <i>Source<sup>a</sup></i>                                                                       |
| Hospitalizations                               | Daily hospitalization rate                                            | Age-, region-, and cause-specific rate          | Agency for Healthcare Research and Quality (2014) <sup>35</sup>                                 |
| Asthma ER Visits                               | Daily asthma ER visit rate                                            | Age- and region-specific visit rate             | Agency for Healthcare Research and Quality (2007) <sup>35</sup>                                 |
| Nonfatal Myocardial Infarction (heart attacks) | Daily nonfatal myocardial infarction incidence rate per person, 18+   | Age-, region-, state-, and county-specific rate | 2007 AHRQ data files; adjusted by 0.93 for probability of surviving after 28 days <sup>36</sup> |
| Asthma Exacerbations                           | Incidence                                                             |                                                 |                                                                                                 |
|                                                | • daily wheeze                                                        | 0.173                                           | Ostro et al. (2001) <sup>17</sup>                                                               |
|                                                | • daily cough                                                         | 0.145                                           |                                                                                                 |
|                                                | • daily dyspnea                                                       | 0.074                                           |                                                                                                 |
| Prevalence among asthmatic children            | 0.0780                                                                | American Lung Association <sup>37</sup>         |                                                                                                 |
| Acute Bronchitis                               | Annual bronchitis incidence rate, children                            | 0.043                                           | American Lung Association (2002) Table 11 <sup>37</sup>                                         |
| Lower Respiratory Symptoms                     | Daily lower respiratory symptom incidence among children <sup>d</sup> | 0.0012                                          | Schwartz and Neas (2000) <sup>16</sup>                                                          |
| Upper Respiratory Symptoms                     | Daily upper respiratory symptom incidence among asthmatic children    | 0.3419                                          | Pope et al. (1991, Table 2) <sup>15</sup>                                                       |
| Work Loss Days                                 | Daily WLD incidence rate per person (18–65)                           |                                                 | US Bureau of the Census (2001) <sup>40</sup>                                                    |
|                                                | • Aged 18–24                                                          | 0.00540                                         |                                                                                                 |
|                                                | • Aged 25–44                                                          | 0.00678                                         |                                                                                                 |
| • Aged 45–64                                   | 0.00492                                                               |                                                 |                                                                                                 |
| Minor Restricted-Activity Days                 | Daily MRAD incidence rate per person                                  | 0.02137                                         | Ostro and Rothschild (1989) <sup>20</sup>                                                       |

<sup>a</sup> Healthcare Cost and Utilization Program (HCUP) database contains individual level, state and regional-level hospital and emergency department discharges for a variety of ICD codes.

<sup>b</sup> See [ftp://ftp.cdc.gov/pub/Health\\_Statistics/NCHS/Datasets/NHDS/](ftp://ftp.cdc.gov/pub/Health_Statistics/NCHS/Datasets/NHDS/).

<sup>c</sup> See [ftp://ftp.cdc.gov/pub/Health\\_Statistics/NCHS/Datasets/NHAMCS/](ftp://ftp.cdc.gov/pub/Health_Statistics/NCHS/Datasets/NHAMCS/).

<sup>d</sup> Lower respiratory symptoms are defined as two or more of the following: cough, chest pain, phlegm, and wheeze.

Table S-6 PM<sub>2.5</sub> + Ozone Related Mortality and Morbidity Outcomes Attributable to 17 Mobile Source Sectors in 2011

| Premature Death                            | Nonroad recreational (incl. pleasure craft) |          |           | Nonroad construction |           |           | Nonroad lawn & garden commercial |          |           | Nonroad lawn & garden residential |         |         |
|--------------------------------------------|---------------------------------------------|----------|-----------|----------------------|-----------|-----------|----------------------------------|----------|-----------|-----------------------------------|---------|---------|
|                                            | Point Estimate                              | 2.5%     | 95%       | Point Estimate       | 2.5%      | 95%       | Point Estimate                   | 2.5%     | 95%       | Point Estimate                    | 2.5%    | 95%     |
| Krewski et al. (2009) & Bell et al. (2004) | 720                                         | 420      | 1,000     | 1,900                | 1,200     | 2,600     | 740                              | 480      | 990       | 210                               | 130     | 290     |
| Lepeule et al. (2012) & Levy et al. (2005) | 2,100                                       | 1,200    | 3,000     | 4,800                | 2,500     | 7,000     | 1,800                            | 950      | 2,700     | 560                               | 310     | 810     |
| <i>Non-Fatal heart attacks</i>             |                                             |          |           |                      |           |           |                                  |          |           |                                   |         |         |
| Peters et al. (2001)                       | 490                                         | 120      | 860       | 1,600                | 390       | 2,800     | 620                              | 150      | 1,100     | 170                               | 40      | 290     |
| Pooled Estimate of 4 Studies               | 53                                          | 19       | 140       | 170                  | 64        | 470       | 67                               | 25       | 180       | 18                                | 7       | 48      |
| Cardiovascular Hospital Admissions         | 120                                         | 55       | 220       | 410                  | 190       | 740       | 160                              | 71       | 280       | 43                                | 19      | 76      |
| Respiratory Hospital Admissions            | 400                                         | -100     | 850       | 630                  | -150      | 1,300     | 230                              | -60      | 460       | 90                                | -20     | 180     |
| Respiratory Emergency Department Visits    | 1,900                                       | 44       | 5,200     | 2,600                | -310      | 6,500     | 920                              | -110     | 2,300     | 400                               | -18     | 1,100   |
| Acute Bronchitis                           | 790                                         | -180     | 1,700     | 2,800                | -650      | 6,100     | 1,000                            | -240     | 2,300     | 270                               | -64     | 600     |
| Acute Respiratory Symptoms                 | 1,700,000                                   | 860,000  | 2,500,000 | 2,600,000            | 1,700,000 | 3,400,000 | 930,000                          | 610,000  | 1,300,000 | 360,000                           | 210,000 | 510,000 |
| Aggravated Asthma                          | 550,000                                     | -460,000 | 1,300,000 | 520,000              | -400,000  | 1,300,000 | 180,000                          | -140,000 | 440,000   | 98,000                            | -80,000 | 240,000 |
| Upper Respiratory Symptoms                 | 14,000                                      | 2,600    | 26,000    | 50,000               | 9,100     | 91,000    | 19,000                           | 3,400    | 34,000    | 4,900                             | 900     | 9,000   |
| Lower Respiratory Symptoms                 | 10,000                                      | 3,800    | 16,000    | 35,000               | 13,000    | 57,000    | 13,000                           | 5,000    | 21,000    | 3,500                             | 1,300   | 5,600   |
| Lost Work Days                             | 71,000                                      | 60,000   | 82,000    | 250,000              | 210,000   | 290,000   | 95,000                           | 81,000   | 110,000   | 25,000                            | 21,000  | 29,000  |
| Lost School Days                           | 400,000                                     | 140,000  | 880,000   | 340,000              | 120,000   | 760,000   | 120,000                          | 42,000   | 260,000   | 68,000                            | 24,000  | 150,000 |

| Premature Death                            | Nonroad agriculture |          |           | Nonroad commercial |          |         | Nonroad all other: (industrial, logging, mining, oil field) |          |           | Onroad light duty gas cars and motorcycles |           |           |
|--------------------------------------------|---------------------|----------|-----------|--------------------|----------|---------|-------------------------------------------------------------|----------|-----------|--------------------------------------------|-----------|-----------|
|                                            | Point Estimate      | 2.5%     | 95%       | Point Estimate     | 2.5%     | 95%     | Point Estimate                                              | 2.5%     | 95%       | Point Estimate                             | 2.5%      | 95%       |
| Krewski et al. (2009) & Bell et al. (2004) | 660                 | 380      | 940       | 530                | 340      | 720     | 590                                                         | 370      | 800       | 2,700                                      | 1,700     | 3,700     |
| Lepeule et al. (2012) & Levy et al. (2005) | 1,900               | 1,100    | 2,800     | 1,300              | 700      | 1,900   | 1,500                                                       | 810      | 2,200     | 7,100                                      | 3,900     | 10,300    |
| <i>Non-Fatal heart attacks</i>             |                     |          |           |                    |          |         |                                                             |          |           |                                            |           |           |
| Peters et al. (2001)                       | 450                 | 110      | 780       | 440                | 110      | 770     | 480                                                         | 120      | 830       | 2,100                                      | 520       | 3,700     |
| Pooled Estimate of 4 Studies               | 48                  | 18       | 130       | 48                 | 18       | 130     | 51                                                          | 19       | 140       | 230                                        | 84        | 610       |
| Cardiovascular Hospital Admissions         | 110                 | 48       | 190       | 120                | 53       | 210     | 120                                                         | 55       | 220       | 540                                        | 240       | 970       |
| Respiratory Hospital Admissions            | 390                 | -100     | 830       | 180                | -40      | 350     | 220                                                         | -60      | 460       | 1,100                                      | -280      | 2,300     |
| Respiratory Emergency Department Visits    | 1,700               | 44       | 4,600     | 760                | -95      | 1,900   | 940                                                         | -66      | 2,400     | 4,800                                      | -210      | 12,600    |
| Acute Bronchitis                           | 710                 | -170     | 1,600     | 760                | -180     | 1,700   | 820                                                         | -190     | 1,800     | 3,600                                      | -850      | 8,000     |
| Acute Respiratory Symptoms                 | 1,500,000           | 780,000  | 2,300,000 | 720,000            | 470,000  | 980,000 | 900,000                                                     | 550,000  | 1,300,000 | 4,500,000                                  | 2,600,000 | 6,400,000 |
| Aggravated Asthma                          | 540,000             | -450,000 | 1,300,000 | 150,000            | -110,000 | 350,000 | 220,000                                                     | -180,000 | 540,000   | 1,200,000                                  | -980,000  | 2,900,000 |
| Upper Respiratory Symptoms                 | 13,000              | 2,400    | 24,000    | 14,000             | 2,500    | 25,000  | 15,000                                                      | 2,700    | 27,000    | 66,000                                     | 12,000    | 120,000   |
| Lower Respiratory Symptoms                 | 9,100               | 3,400    | 15,000    | 9,700              | 3,700    | 16,000  | 10,000                                                      | 4,000    | 17,000    | 46,000                                     | 17,000    | 74,000    |
| Lost Work Days                             | 61,000              | 51,000   | 70,000    | 72,000             | 61,000   | 83,000  | 73,000                                                      | 62,000   | 85,000    | 330,000                                    | 280,000   | 380,000   |
| Lost School Days                           | 390,000             | 140,000  | 860,000   | 96,000             | 34,000   | 210,000 | 150,000                                                     | 54,000   | 340,000   | 840,000                                    | 300,000   | 1,900,000 |

Table S-6 (Continued) PM2.5 + Ozone Related Mortality and Morbidity Outcomes Attributable to 17 Mobile Source Sectors in 2011

| Premature Death                            | Onroad light duty gas trucks |            |           | Onroad heavy duty gas + CNG |         |         | Onroad light duty diesel |          |         | Onroad heavy duty diesel |            |            |
|--------------------------------------------|------------------------------|------------|-----------|-----------------------------|---------|---------|--------------------------|----------|---------|--------------------------|------------|------------|
|                                            | Point Estimate               | 2.5%       | 95%       | Point Estimate              | 2.5%    | 95%     | Point Estimate           | 2.5%     | 95%     | Point Estimate           | 2.5%       | 95%        |
| Krewski et al. (2009) & Bell et al. (2004) | 3,200                        | 1,900      | 4,400     | 130                         | 80      | 180     | 320                      | 200      | 440     | 5,300                    | 3,300      | 7,200      |
| Lepeule et al. (2012) & Levy et al. (2005) | 8,800                        | 5,000      | 12,600    | 360                         | 210     | 520     | 840                      | 460      | 1,200   | 13,700                   | 7,500      | 19,900     |
| <i>Non-Fatal heart attacks</i>             |                              |            |           |                             |         |         |                          |          |         |                          |            |            |
| Peters et al. (2001)                       | 2,300                        | 560        | 4,000     | 88                          | 21      | 150     | 250                      | 62       | 440     | 4,200                    | 1,000      | 7,400      |
| Pooled Estimate of 4 Studies               | 250                          | 91         | 660       | 9                           | 4       | 25      | 27                       | 10       | 73      | 460                      | 170        | 1,200      |
| Cardiovascular Hospital Admissions         | 580                          | 260        | 1,000     | 22                          | 10      | 40      | 65                       | 29       | 120     | 1,100                    | 480        | 1,900      |
| Respiratory Hospital Admissions            | 1,600                        | -390       | 3,300     | 70                          | -20     | 140     | 130                      | -30      | 270     | 2,100                    | -540       | 4,400      |
| Respiratory Emergency Department Visits    | 7,200                        | -24        | 22,000    | 320                         | 3       | 890     | 550                      | -26      | 1,500   | 8,700                    | -450       | 25,000     |
| Acute Bronchitis                           | 3,900                        | -920       | 8,700     | 150                         | -34     | 330     | 450                      | -100     | 1,000   | 7,100                    | -1,700     | 16,000     |
| Acute Respiratory Symptoms                 | 6,500,000                    | 3,500,000  | 9,400,000 | 280,000                     | 150,000 | 410,000 | 540,000                  | 320,000  | 760,000 | 8,400,000                | 5,000,000  | 11,800,000 |
| Aggravated Asthma                          | 2,000,000                    | -1,700,000 | 4,900,000 | 92,000                      | -76,000 | 220,000 | 140,000                  | -120,000 | 350,000 | 2,200,000                | -1,800,000 | 5,400,000  |
| Upper Respiratory Symptoms                 | 71,000                       | 13,000     | 130,000   | 2,700                       | 480     | 4,800   | 8,100                    | 1,500    | 15,000  | 130,000                  | 24,000     | 240,000    |
| Lower Respiratory Symptoms                 | 50,000                       | 19,000     | 81,000    | 1,900                       | 710     | 3,000   | 5,700                    | 2,200    | 9,200   | 90,000                   | 34,000     | 146,000    |
| Lost Work Days                             | 350,000                      | 300,000    | 400,000   | 13,000                      | 11,000  | 15,000  | 40,000                   | 34,000   | 46,000  | 630,000                  | 530,000    | 730,000    |
| Lost School Days                           | 1,400,000                    | 510,000    | 3,200,000 | 65,000                      | 23,000  | 150,000 | 99,000                   | 35,000   | 220,000 | 1,500,000                | 550,000    | 3,400,000  |

| Premature Death                            | c1c2 marine    |          |           | c3 marine      |           |           | Rail           |           |           | Aircraft (excluding ground support) |         |         | Aircraft ground support only |        |        |
|--------------------------------------------|----------------|----------|-----------|----------------|-----------|-----------|----------------|-----------|-----------|-------------------------------------|---------|---------|------------------------------|--------|--------|
|                                            | Point Estimate | 2.5%     | 95%       | Point Estimate | 2.5%      | 95%       | Point Estimate | 2.5%      | 95%       | Point Estimate                      | 2.5%    | 95%     | Point Estimate               | 2.5%   | 95%    |
| Krewski et al. (2009) & Bell et al. (2004) | 510            | 300      | 720       | 1,900          | 1,200     | 2,600     | 1,100          | 680       | 1,500     | 380                                 | 250     | 520     | 26                           | 16     | 35     |
| Lepeule et al. (2012) & Levy et al. (2005) | 1,500          | 840      | 2,100     | 4,900          | 2,600     | 7,100     | 3,000          | 1,700     | 4,300     | 930                                 | 490     | 1,400   | 65                           | 35     | 95     |
| <i>Non-Fatal heart attacks</i>             |                |          |           |                |           |           |                |           |           |                                     |         |         |                              |        |        |
| Peters et al. (2001)                       | 350            | 86       | 610       | 1,500          | 370       | 2,700     | 850            | 210       | 1,500     | 330                                 | 81      | 580     | 21                           | 5      | 37     |
| Pooled Estimate of 4 Studies               | 38             | 14       | 100       | 160            | 61        | 440       | 92             | 34        | 250       | 36                                  | 13      | 96      | 2                            | 1      | 6      |
| Cardiovascular Hospital Admissions         | 91             | 41       | 160       | 400            | 180       | 710       | 210            | 94        | 370       | 85                                  | 38      | 150     | 5                            | 2      | 10     |
| Respiratory Hospital Admissions            | 280            | -70      | 600       | 690            | -180      | 1,400     | 500            | -130      | 1,100     | 120                                 | -30     | 230     | 9                            | -2     | 19     |
| Respiratory Emergency Department Visits    | 1,300          | -2       | 3,500     | 2,900          | -210      | 7,500     | 2,000          | -39       | 5,500     | 450                                 | -64     | 1,100   | 40                           | -3     | 100    |
| Acute Bronchitis                           | 550            | -130     | 1,200     | 2,700          | -630      | 5,900     | 1,400          | -330      | 3,100     | 580                                 | -140    | 1,300   | 36                           | -8     | 80     |
| Acute Respiratory Symptoms                 | 1,100,000      | 580,000  | 1,600,000 | 2,900,000      | 1,800,000 | 4,100,000 | 2,000,000      | 1,100,000 | 2,800,000 | 490,000                             | 330,000 | 650,000 | 40,000                       | 24,000 | 56,000 |
| Aggravated Asthma                          | 360,000        | -300,000 | 860,000   | 690,000        | -550,000  | 1,700,000 | 580,000        | -480,000  | 1,400,000 | 90,000                              | -67,000 | 220,000 | 9,900                        | -7,900 | 24,000 |
| Upper Respiratory Symptoms                 | 10,000         | 1,800    | 18,000    | 49,000         | 8,800     | 88,000    | 26,000         | 4,600     | 46,000    | 11,000                              | 1,900   | 19,000  | 650                          | 120    | 1,200  |
| Lower Respiratory Symptoms                 | 7,000          | 2,600    | 11,000    | 34,000         | 13,000    | 55,000    | 18,000         | 6,800     | 29,000    | 7,400                               | 2,800   | 12,000  | 460                          | 170    | 740    |
| Lost Work Days                             | 54,000         | 46,000   | 62,000    | 250,000        | 210,000   | 280,000   | 120,000        | 100,000   | 140,000   | 53,000                              | 45,000  | 61,000  | 3,300                        | 2,800  | 3,800  |
| Lost School Days                           | 250,000        | 90,000   | 560,000   | 470,000        | 170,000   | 1,000,000 | 410,000        | 140,000   | 910,000   | 57,000                              | 20,000  | 130,000 | 6,700                        | 2,400  | 15,000 |



Table S-7 PM2.5 + Ozone Related Mortality and Morbidity Outcomes Attributable to 17 Mobile Source Sectors in 2025

| Premature Death                            | Nonroad recreational (incl. pleasure craft) |          |           | Nonroad construction |          |           | Nonroad lawn & garden commercial |          |           | Nonroad lawn & garden residential |         |         |
|--------------------------------------------|---------------------------------------------|----------|-----------|----------------------|----------|-----------|----------------------------------|----------|-----------|-----------------------------------|---------|---------|
|                                            | Point Estimate                              | 2.5%     | 95%       | Point Estimate       | 2.5%     | 95%       | Point Estimate                   | 2.5%     | 95%       | Point Estimate                    | 2.5%    | 95%     |
| Krewski et al. (2009) & Bell et al. (2004) | 520                                         | 280      | 760       | 840                  | 520      | 1,200     | 1,100                            | 710      | 1,500     | 300                               | 190     | 410     |
| Lepeule et al. (2012) & Levy et al. (2005) | 1,700                                       | 1,000    | 2,400     | 2,300                | 1,200    | 3,300     | 2,700                            | 1,400    | 3,900     | 760                               | 410     | 1,100   |
| <i>Non-Fatal heart attacks</i>             |                                             |          |           |                      |          |           |                                  |          |           |                                   |         |         |
| Peters et al. (2001)                       | 310                                         | 76       | 550       | 710                  | 170      | 1,200     | 1,000                            | 250      | 1,800     | 280                               | 67      | 480     |
| Pooled Estimate of 4 Studies               | 34                                          | 12       | 90        | 80                   | 28       | 210       | 110                              | 41       | 290       | 30                                | 11      | 79      |
| Cardiovascular Hospital Admissions         | 78                                          | 34       | 140       | 180                  | 81       | 340       | 260                              | 110      | 480       | 71                                | 31      | 130     |
| Respiratory Hospital Admissions            | 470                                         | -120     | 1,000     | 430                  | -120     | 910       | 390                              | -120     | 800       | 120                               | -36     | 250     |
| Respiratory Emergency Department Visits    | 1,700                                       | 91       | 4,800     | 1,500                | -61      | 4,000     | 1,200                            | -160     | 3,100     | 420                               | -39     | 1,100   |
| Acute Bronchitis                           | 400                                         | -93      | 880       | 1,000                | -240     | 2,300     | 1,400                            | -320     | 3,100     | 380                               | -89     | 840     |
| Acute Respiratory Symptoms                 | 1,400,000                                   | 650,000  | 2,100,000 | 1,300,000            | 770,000  | 1,900,000 | 1,200,000                        | 810,000  | 1,600,000 | 380,000                           | 240,000 | 520,000 |
| Aggravated Asthma                          | 510,000                                     | -430,000 | 1,200,000 | 370,000              | -300,000 | 890,000   | 230,000                          | -170,000 | 540,000   | 85,000                            | -66,000 | 200,000 |
| Upper Respiratory Symptoms                 | 7,100                                       | 1,300    | 13,000    | 18,000               | 3,300    | 33,000    | 25,000                           | 4,500    | 45,000    | 6,800                             | 1,200   | 12,000  |
| Lower Respiratory Symptoms                 | 5,000                                       | 1,900    | 8,100     | 13,000               | 4,900    | 21,000    | 18,000                           | 6,700    | 28,000    | 4,800                             | 1,800   | 7,800   |
| Lost Work Days                             | 36,000                                      | 30,000   | 41,000    | 93,000               | 79,000   | 110,000   | 130,000                          | 110,000  | 150,000   | 35,000                            | 29,000  | 40,000  |
| Lost School Days                           | 370,000                                     | 130,000  | 820,000   | 260,000              | 90,000   | 570,000   | 150,000                          | 51,000   | 320,000   | 57,000                            | 20,000  | 130,000 |

| Premature Death                            | Nonroad agriculture |          |           | Nonroad commercial |          |         | Nonroad all other: (industrial, logging, mining, oil field) |          |         | Onroad light duty gas cars and motorcycles |           |           |
|--------------------------------------------|---------------------|----------|-----------|--------------------|----------|---------|-------------------------------------------------------------|----------|---------|--------------------------------------------|-----------|-----------|
|                                            | Point Estimate      | 2.5%     | 95%       | Point Estimate     | 2.5%     | 95%     | Point Estimate                                              | 2.5%     | 95%     | Point Estimate                             | 2.5%      | 95%       |
| Krewski et al. (2009) & Bell et al. (2004) | 340                 | 180      | 500       | 450                | 290      | 620     | 340                                                         | 210      | 480     | 1,700                                      | 1,100     | 2,300     |
| Lepeule et al. (2012) & Levy et al. (2005) | 1,100               | 690      | 1,600     | 1,200              | 640      | 1,700   | 960                                                         | 540      | 1,400   | 4,300                                      | 2,300     | 6,200     |
| <i>Non-Fatal heart attacks</i>             |                     |          |           |                    |          |         |                                                             |          |         |                                            |           |           |
| Peters et al. (2001)                       | 200                 | 50       | 360       | 410                | 99       | 710     | 280                                                         | 69       | 490     | 1,600                                      | 380       | 2,700     |
| Pooled Estimate of 4 Studies               | 22                  | 8        | 59        | 44                 | 16       | 120     | 30                                                          | 11       | 81      | 170                                        | 62        | 450       |
| Cardiovascular Hospital Admissions         | 49                  | 22       | 91        | 110                | 47       | 200     | 71                                                          | 31       | 130     | 400                                        | 180       | 740       |
| Respiratory Hospital Admissions            | 300                 | -78      | 660       | 210                | -59      | 430     | 200                                                         | -56      | 430     | 710                                        | -220      | 1,500     |
| Respiratory Emergency Department Visits    | 1,000               | 51       | 2,800     | 760                | -57      | 2,000   | 710                                                         | -8       | 1,900   | 2,200                                      | -200      | 5,700     |
| Acute Bronchitis                           | 270                 | -63      | 600       | 580                | -130     | 1,300   | 390                                                         | -92      | 880     | 2,200                                      | -520      | 4,900     |
| Acute Respiratory Symptoms                 | 850,000             | 410,000  | 1,300,000 | 660,000            | 400,000  | 910,000 | 610,000                                                     | 340,000  | 890,000 | 2,200,000                                  | 1,400,000 | 3,000,000 |
| Aggravated Asthma                          | 330,000             | -280,000 | 800,000   | 160,000            | -120,000 | 380,000 | 190,000                                                     | -150,000 | 450,000 | 490,000                                    | -380,000  | 1,200,000 |
| Upper Respiratory Symptoms                 | 4,800               | 880      | 8,800     | 10,000             | 1,900    | 19,000  | 7,100                                                       | 1,300    | 13,000  | 40,000                                     | 7,200     | 72,000    |
| Lower Respiratory Symptoms                 | 3,400               | 1,300    | 5,500     | 7,300              | 2,800    | 12,000  | 5,000                                                       | 1,900    | 8,100   | 28,000                                     | 11,000    | 45,000    |
| Lost Work Days                             | 23,000              | 19,000   | 26,000    | 54,000             | 46,000   | 63,000  | 36,000                                                      | 30,000   | 41,000  | 200,000                                    | 170,000   | 230,000   |
| Lost School Days                           | 240,000             | 84,000   | 530,000   | 107,000            | 38,000   | 240,000 | 130,000                                                     | 46,000   | 290,000 | 320,000                                    | 110,000   | 720,000   |

Table S-7 (Continued) PM2.5 + Ozone Related Mortality and Morbidity Outcomes Attributable to 17 Mobile Source Sectors in 2025

| Premature Death                            | Onroad light duty gas trucks |           |           | Onroad heavy duty gas + CNG |         |         | Onroad light duty diesel |          |           | Onroad heavy duty diesel |            |           |
|--------------------------------------------|------------------------------|-----------|-----------|-----------------------------|---------|---------|--------------------------|----------|-----------|--------------------------|------------|-----------|
|                                            | Point Estimate               | 2.5%      | 95%       | Point Estimate              | 2.5%    | 95%     | Point Estimate           | 2.5%     | 95%       | Point Estimate           | 2.5%       | 95%       |
| Krewski et al. (2009) & Bell et al. (2004) | 1,800                        | 1,100     | 2,500     | 100                         | 61      | 140     | 610                      | 360      | 850       | 2,500                    | 1,500      | 3,400     |
| Lepeule et al. (2012) & Levy et al. (2005) | 4,800                        | 2,600     | 7,000     | 290                         | 160     | 410     | 1,700                    | 970      | 2,500     | 7,000                    | 4,000      | 10,000    |
| <i>Non-Fatal heart attacks</i>             |                              |           |           |                             |         |         |                          |          |           |                          |            |           |
| Peters et al. (2001)                       | 1,600                        | 400       | 2,800     | 80                          | 20      | 140     | 490                      | 120      | 860       | 2,000                    | 480        | 3,400     |
| Pooled Estimate of 4 Studies               | 180                          | 65        | 470       | 9                           | 3       | 23      | 53                       | 20       | 140       | 210                      | 78         | 570       |
| Cardiovascular Hospital Admissions         | 420                          | 180       | 760       | 21                          | 9       | 38      | 130                      | 55       | 230       | 500                      | 220        | 910       |
| Respiratory Hospital Admissions            | 890                          | -260      | 1,900     | 62                          | -17     | 130     | 370                      | -100     | 790       | 1,500                    | -420       | 3,200     |
| Respiratory Emergency Department Visits    | 2,900                        | -150      | 7,600     | 220                         | -1      | 590     | 1,300                    | -6       | 3,500     | 5,100                    | -19        | 15,000    |
| Acute Bronchitis                           | 2,300                        | -540      | 5,100     | 110                         | -26     | 250     | 690                      | -160     | 1,500     | 2,700                    | -630       | 6,000     |
| Acute Respiratory Symptoms                 | 2,800,000                    | 1,600,000 | 3,900,000 | 190,000                     | 100,000 | 270,000 | 1,100,000                | 620,000  | 1,700,000 | 4,400,000                | 2,400,000  | 6,500,000 |
| Aggravated Asthma                          | 710,000                      | -570,000  | 1,700,000 | 58,000                      | -48,000 | 140,000 | 350,000                  | -290,000 | 840,000   | 1,400,000                | -1,100,000 | 3,300,000 |
| Upper Respiratory Symptoms                 | 42,000                       | 7,600     | 76,000    | 2,000                       | 360     | 3,600   | 13,000                   | 2,300    | 23,000    | 49,000                   | 8,800      | 88,000    |
| Lower Respiratory Symptoms                 | 29,000                       | 11,000    | 47,000    | 1,400                       | 540     | 2,300   | 8,800                    | 3,300    | 14,000    | 34,000                   | 13,000     | 55,000    |
| Lost Work Days                             | 210,000                      | 180,000   | 240,000   | 10,000                      | 8,500   | 12,000  | 63,000                   | 54,000   | 73,000    | 240,000                  | 200,000    | 280,000   |
| Lost School Days                           | 490,000                      | 170,000   | 1,100,000 | 41,000                      | 15,000  | 92,000  | 250,000                  | 87,000   | 550,000   | 980,000                  | 350,000    | 2,200,000 |

| Premature Death                            | c1c2 marine    |          |           | c3 marine      |           |           | Rail           |           |           | Aircraft (excluding ground support) |          |           | Aircraft ground support only |         |         |
|--------------------------------------------|----------------|----------|-----------|----------------|-----------|-----------|----------------|-----------|-----------|-------------------------------------|----------|-----------|------------------------------|---------|---------|
|                                            | Point Estimate | 2.5%     | 95%       | Point Estimate | 2.5%      | 95%       | Point Estimate | 2.5%      | 95%       | Point Estimate                      | 2.5%     | 95%       | Point Estimate               | 2.5%    | 95%     |
| Krewski et al. (2009) & Bell et al. (2004) | 390            | 220      | 560       | 800            | 400       | 1,100     | 1,000          | 590       | 1,400     | 650                                 | 410      | 880       | 42                           | 25      | 58      |
| Lepeule et al. (2012) & Levy et al. (2005) | 1,200          | 730      | 1,700     | 2,500          | 1,600     | 3,500     | 3,000          | 1,700     | 4,200     | 1,700                               | 900      | 2,400     | 120                          | 65      | 170     |
| <i>Non-Fatal heart attacks</i>             |                |          |           |                |           |           |                |           |           |                                     |          |           |                              |         |         |
| Peters et al. (2001)                       | 270            | 66       | 470       | 470            | 110       | 820       | 750            | 180       | 1,300     | 590                                 | 140      | 1,000     | 35                           | 9       | 61      |
| Pooled Estimate of 4 Studies               | 29             | 11       | 80        | 50             | 19        | 140       | 81             | 30        | 220       | 63                                  | 23       | 170       | 4                            | 1       | 10      |
| Cardiovascular Hospital Admissions         | 70             | 31       | 130       | 120            | 54        | 230       | 180            | 81        | 340       | 150                                 | 67       | 280       | 9                            | 4       | 17      |
| Respiratory Hospital Admissions            | 320            | -83      | 700       | 720            | -190      | 1,600     | 680            | -180      | 1,500     | 290                                 | -86      | 610       | 24                           | -7      | 51      |
| Respiratory Emergency Department Visits    | 1,100          | 28       | 3,100     | 2,800          | 140       | 8,700     | 2,200          | 36        | 6,100     | 970                                 | -70      | 2,500     | 88                           | -2      | 240     |
| Acute Bronchitis                           | 360            | -84      | 800       | 650            | -150      | 1,500     | 1,000          | -240      | 2,300     | 830                                 | -190     | 1,800     | 49                           | -12     | 110     |
| Acute Respiratory Symptoms                 | 910,000        | 460,000  | 1,400,000 | 2,300,000      | 1,100,000 | 3,400,000 | 1,900,000      | 1,000,000 | 2,900,000 | 930,000                             | 560,000  | 1,300,000 | 78,000                       | 43,000  | 110,000 |
| Aggravated Asthma                          | 320,000        | -270,000 | 760,000   | 810,000        | -690,000  | 2,000,000 | 650,000        | -540,000  | 1,600,000 | 220,000                             | -180,000 | 530,000   | 23,000                       | -19,000 | 56,000  |
| Upper Respiratory Symptoms                 | 6,500          | 1,200    | 12,000    | 12,000         | 2,100     | 21,000    | 18,000         | 3,300     | 33,000    | 15,000                              | 2,700    | 27,000    | 890                          | 160     | 1,600   |
| Lower Respiratory Symptoms                 | 4,600          | 1,700    | 7,400     | 8,300          | 3,200     | 13,000    | 13,000         | 4,900     | 21,000    | 11,000                              | 4,000    | 17,000    | 630                          | 240     | 1,000   |
| Lost Work Days                             | 35,000         | 30,000   | 40,000    | 62,000         | 52,000    | 71,000    | 89,000         | 75,000    | 100,000   | 77,000                              | 65,000   | 89,000    | 4,600                        | 3,900   | 5,300   |
| Lost School Days                           | 230,000        | 80,000   | 500,000   | 590,000        | 210,000   | 1,300,000 | 470,000        | 170,000   | 1,000,000 | 150,000                             | 53,000   | 330,000   | 16,000                       | 5,700   | 36,000  |

## References

- (1) Krewski, D.; Jerrett, M.; Burnett, R. T.; Ma, R.; Hughes, E.; Shi, Y.; Turner, M. C.; Pope, C. A.; Thurston, G.; Calle, E. E.; et al. Extended Follow-up and Spatial Analysis of the American Cancer Society Study Linking Particulate Air Pollution and Mortality. *Res. Rep. Health. Eff. Inst.* **2009**, No. 140, 5–114; discussion 115-36.
- (2) Lepeule, J.; Laden, F.; Dockery, D. W.; Schwartz, J. D. Chronic Exposure to Fine Particles and Mortality: An Extended Follow-up of the Harvard Six Cities Study from 1974 to 2009. National Institute of Environmental Health Sciences 2012.
- (3) Peters, A.; Dockery, D. W.; Muller, J. E.; Mittleman, M. A. Increased Particulate Air Pollution and the Triggering of Myocardial Infarction. *Circulation* **2001**, *103* (23), 2810–2815. <https://doi.org/10.1161/01.CIR.103.23.2810>.
- (4) Babin, S. M.; Burkom, H. S.; Holtry, R. S.; Taberner, N. R.; Stokes, L. D.; Davies-Cole, J. O.; DeHaan, K.; Lee, D. H. Pediatric Patient Asthma-Related Emergency Department Visits and Admissions in Washington, DC, from 2001-2004, and Associations with Air Quality, Socio-Economic Status and Age Group. *Environ. Health* **2007**, *6*, 9. <https://doi.org/10.1186/1476-069X-6-9>.
- (5) Moolgavkar, S. H. Air Pollution and Hospital Admissions for Diseases of the Circulatory System in Three U.S. Metropolitan Areas. *J. Air Waste Manag. Assoc.* **2000**, *50* (7), 1199–1206.
- (6) Moolgavkar, S. H. Air Pollution and Hospital Admissions for Diseases of the Circulatory System in Three U.S. Metropolitan Areas. *J. Air Waste Manag. Assoc.* **2000**, *50* (7), 1199–1206. <https://doi.org/10.1080/10473289.2000.10464162>.
- (7) Zanobetti, A.; Schwartz, J. Air Pollution and Emergency Admissions in Boston, MA. *J. Epidemiol. Community Health* **2006**, *60* (10), 890–895. <https://doi.org/10.1136/jech.2005.039834>.
- (8) Zanobetti, A.; Schwartz, J. The Effect of Fine and Coarse Particulate Air Pollution on Mortality: A National Analysis. *Environ. Health Perspect.* **2009**, *117* (6), 898–903. <https://doi.org/10.1289/ehp.0800108>.
- (9) Peng, R. D.; Bell, M. L.; Geyh, A. S.; McDermott, A.; Zeger, S. L.; Samet, J. M.; Dominici, F. Emergency Admissions for Cardiovascular and Respiratory Diseases and the Chemical Composition of Fine Particle Air Pollution. *Environ. Health Perspect.* **2009**, *117* (6), 957–963. <https://doi.org/10.1289/ehp.0800185>.
- (10) Peng, R. D.; Chang, H. H.; Bell, M. L.; McDermott, A.; Zeger, S. L.; Samet, J. M.; Dominici, F. Coarse Particulate Matter Air Pollution and Hospital Admissions for Cardiovascular and Respiratory Diseases among Medicare Patients. *JAMA* **2008**, *299* (18), 2172–2179. <https://doi.org/10.1001/jama.299.18.2172>.
- (11) Bell, M. L.; Ebisu, K.; Peng, R. D.; Walker, J.; Samet, J. M.; Zeger, S. L.; Dominici, F. Seasonal and Regional Short-Term Effects of Fine Particles on Hospital Admissions in 202 US Counties, 1999-2005. *Am. J. Epidemiol.* **2008**, *168* (11), 1301–1310. <https://doi.org/10.1093/aje/kwn252>.
- (12) Mar, T. F.; Larson, T. V; Stier, R. a; Claiborn, C.; Koenig, J. Q. An Analysis of the Association between Respiratory Symptoms in Subjects with Asthma and Daily Air Pollution in Spokane,

- Washington. *Inhal. Toxicol.* **2004**, *16* (13), 809–815. <https://doi.org/10.1080/08958370490506646>.
- (13) Slaughter, J. C.; Lumley, T.; Sheppard, L.; Koenig, J. Q.; Shapiro, G. G. Effects of Ambient Air Pollution on Symptom Severity and Medication Use in Children with Asthma. *Ann. Allergy. Asthma Immunol.* **2003**, *91* (4), 346–353. [https://doi.org/10.1016/S1081-1206\(10\)61681-X](https://doi.org/10.1016/S1081-1206(10)61681-X).
- (14) Dockery, D. W.; Cunningham, J.; Damokosh, a I.; Neas, L. M.; Spengler, J. D.; Koutrakis, P.; Ware, J. H.; Raizenne, M.; Speizer, F. E. Health Effects of Acid Aerosols on North American Children: Respiratory Symptoms. *Environ. Health Perspect.* **1996**, *104* (5), 500–505.
- (15) Pope, C. A.; Dockery, D. W.; Spengler, J. D.; Raizenne, M. E. Respiratory Health and PM10 Pollution. A Daily Time Series Analysis. *Am. Rev. Respir. Dis.* **1991**, *144* (3 Pt 1), 668–674.
- (16) Schwartz, J.; Neas, L. M. Fine Particles Are More Strongly Associated than Coarse Particles with Acute Respiratory Health Effects in Schoolchildren. *Epidemiology* **2000**, *11* (1), 6–10.
- (17) Ostro, B.; Lipsett, M.; Mann, J.; Braxton-Owens, H.; White, M. Air Pollution and Exacerbation of Asthma in African-American Children in Los Angeles. *Epidemiology* **2001**, *12* (2), 200–208.
- (18) Ostro, B. D. Air Pollution and Morbidity Revisited: A Specification Test. *J. Environ. Econ. Manage.* **1987**, *14* (1), 87–98. [https://doi.org/10.1016/0095-0696\(87\)90008-8](https://doi.org/10.1016/0095-0696(87)90008-8).
- (19) Ostro, B. D.; Rothschild, S. Air Pollution and Acute Respiratory Morbidity: An Observational Study of Multiple Pollutants. *Environ. Res.* **1989**, *50* (2), 238–247. [https://doi.org/10.1016/S0013-9351\(89\)80004-0](https://doi.org/10.1016/S0013-9351(89)80004-0).
- (20) Ostro, B. D.; Rothschild, S. Air Pollution and Acute Respiratory Morbidity: An Observational Study of Multiple Pollutants. *Environ. Res.* **1989**, *50* (2), 238–247. [https://doi.org/10.1016/S0013-9351\(89\)80004-0](https://doi.org/10.1016/S0013-9351(89)80004-0).
- (21) Smith, R. L.; Xu, B.; Switzer, P. Reassessing the Relationship between Ozone and Short-Term Mortality in U.S. Urban Communities. *Inhal. Toxicol.* **2009**, *21* Suppl 2 (June), 37–61. <https://doi.org/10.1080/08958370903161612>.
- (22) Zanobetti, A.; Schwartz, J. Is There Adaptation in the Ozone Mortality Relationship: A Multi-City Case-Crossover Analysis. *Environ. Health* **2008**, *7*, 22. <https://doi.org/10.1186/1476-069X-7-22>.
- (23) Katsouyanni, K.; Samet, J. M.; Anderson, H. R.; Atkinson, R.; Le Tertre, A.; Medina, S.; Samoli, E.; Touloumi, G.; Burnett, R. T.; Krewski, D.; et al. Air Pollution and Health: A European and North American Approach (APHENA). *Res. Rep. Heal. Eff. Inst.* **2009**, No. 142, 5–90.
- (24) Glad, J. A.; Brink, L. L.; Talbott, E. O.; Lee, P. C.; Xu, X.; Saul, M.; Rager, J. The Relationship of Ambient Ozone and PM2.5 Levels and Asthma Emergency Department Visits: Possible Influence of Gender and Ethnicity. *Archives of Environmental and Occupational Health*. 2012, pp 103–108. <https://doi.org/10.1080/19338244.2011.598888>.
- (25) Ito, K.; Thurston, G. D.; Silverman, R. a. Characterization of PM2.5, Gaseous Pollutants, and Meteorological Interactions in the Context of Time-Series Health Effects Models. *J. Expo. Sci. Environ. Epidemiol.* **2007**, *17* Suppl 2, S45-60. <https://doi.org/10.1038/sj.jes.7500627>.
- (26) Mar, T. F.; Koenig, J. Q. Relationship between Visits to Emergency Departments for Asthma and Ozone Exposure in Greater Seattle, Washington . *Annals of Allergy, Asthma, and Immunology*. 2009, pp 474–479. [https://doi.org/10.1016/S1081-1206\(10\)60263-3](https://doi.org/10.1016/S1081-1206(10)60263-3).
- (27) Peel, J. L.; Tolbert, P. E.; Klein, M.; Metzger, K. B.; Flanders, W. D.; Todd, K.; Mulholland, J. A.; Ryan, P. B.; Frumkin, H. Ambient Air Pollution and Respiratory Emergency Department Visits.

- Epidemiology* **2005**, *16* (2), 164–174.
- (28) Sarnat, J. A.; Sarnat, S. E.; Flanders, W. D.; Chang, H. H.; Mulholland, J.; Baxter, L.; Isakov, V.; Ozkaynak, H. Spatiotemporally Resolved Air Exchange Rate as a Modifier of Acute Air Pollution-Related Morbidity in Atlanta. *Journal of Exposure Science and Environmental Epidemiology*. 2013, pp 606–615. <https://doi.org/10.1038/jes.2013.32>.
- (29) Wilson, A. M.; Wake, C. P.; Kelly, T.; Salloway, J. C. Air Pollution, Weather, and Respiratory Emergency Room Visits in Two Northern New England Cities: An Ecological Time-Series Study. *Environ. Res.* **2005**, *97* (3), 312–321. <https://doi.org/10.1016/j.envres.2004.07.010>.
- (30) Mortimer, K. M.; Neas, L. M.; Dockery, D. W.; Redline, S.; Tager, I. B. The Effect of Air Pollution on Inner-City Children with Asthma. *Eur. Respir. J.* **2002**, *19* (4), 699–705. <https://doi.org/10.1183/09031936.02.00247102>.
- (31) Schildcrout, J. S.; Sheppard, L.; Lumley, T.; Slaughter, J. C.; Koenig, J. Q.; Shapiro, G. G. Ambient Air Pollution and Asthma Exacerbations in Children: An Eight-City Analysis. *Am. J. Epidemiol.* **2006**, *164* (6), 505–517. <https://doi.org/10.1093/aje/kwj225>.
- (32) Chen, Lei Jennison, Brian L. Yang, Wei Omaye, S. T. Elementary School Absenteeism and Air Pollution. *Inhal. Toxicol.* **2000**, *12* (11), 20. <https://doi.org/10.1080/08958370050164626>.
- (33) Gilliland, F. D.; Berhane, K.; Rappaport, E. B.; Thomas, D. C.; Avol, E.; Gauderman, W. J.; London, S. J.; Margolis, H. G.; McConnell, R.; Islam, K. T.; et al. The Effects of Ambient Air Pollution on School Absenteeism Due to Respiratory Illnesses. *Epidemiology* **2001**, *12* (1), 43–54.
- (34) Agency for Healthcare Research and Quality. *HCUPNet*; Rockville, MD, 2014.
- (35) Agency for Healthcare Research and Quality. *Healthcare Cost and Utilization Project (HCUP)*; Rockville, MD, 2014.
- (36) Rosamond, W. Comparison of Medical Care and Survival of Hospitalized Patients with Acute Myocardial Infarction in Poland and the United States. *Am. J. Cardiol.* **1999**, *83* (8), 1180–1185. [https://doi.org/10.1016/S0002-9149\(99\)00056-9](https://doi.org/10.1016/S0002-9149(99)00056-9).
- (37) Trends in Asthma Morbidity and Mortality American Lung Association Epidemiology and Statistics Unit Research and Program Services Division February 2010. *Program* **2010**, No. February.
- (38) American Lung Association. *Trends in Asthma Morbidity and Mortality*; Washington, DC, 2010.
- (39) Schwartz, J. PM10, Ozone, and Hospital Admissions for the Elderly in Minneapolis-St. Paul, Minnesota. *Arch. Environ. Health* **1994**, *49* (5), 366–374. <https://doi.org/10.1080/00039896.1994.9954989>.
- (40) US Bureau of the Census. *Statistical Abstract of the United States, 2001*; Washington, DC, **2001**.
